# Supplementary material for: RIPK3 Induces Cardiomyocyte Necroptosis via Inhibition of AMPK‐Parkin‐Mitophagy in Cardiac Remodelling after Myocardial Infarction
Source: Hindawi journal article supplement (doi:10.1155/2021/6635955), 2021-01-01

### Supplemental Figure

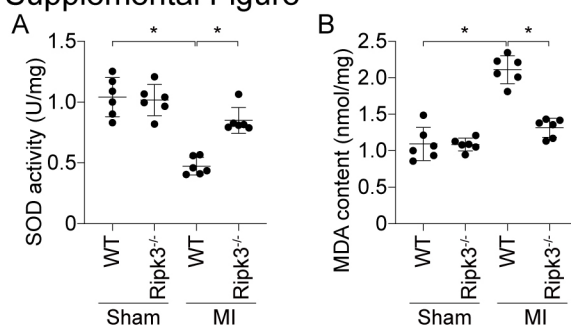

Supplement: f1 [file 6635955.f1.pdf]
